# Supplementary material for: Posidonia oceanica (L.) Delile Dampens Cell Migration of Human Neuroblastoma Cells
Source: MDPI journal article supplement (doi:10.3390/md19100579), 2021-10-15

**Figure S1.** Effect of 70% (v/v) EtOH vehicle in SH-SY5Y cells. Representative images of Western blot analysis of the key autophagic markers levels investigated in vehicle-treated SH-SY5Y cells over time.

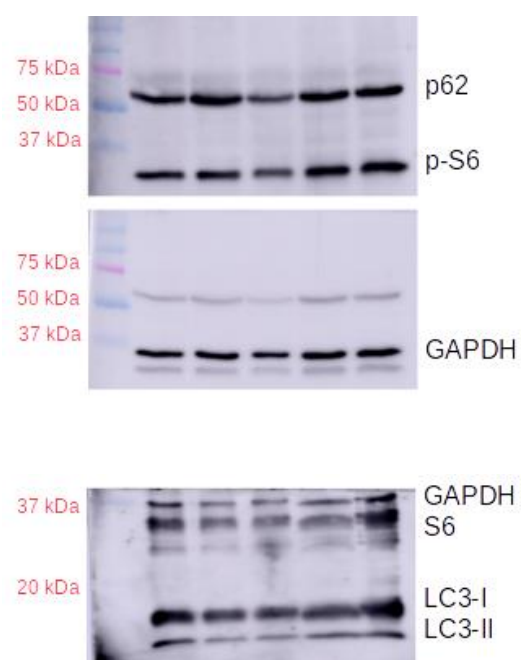

Supplement: s1 [file s1]
